# Supplementary material for: Flexible freestanding MoS 2 -based composite paper for energy conversion and storage
Source: publisher site journal article supplement (doi:10.3762/bjnano.10.147), 2019-07-24
Supplement: Additional file 1 [file 2190-4286-10-147-S1.pdf]

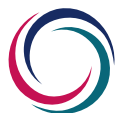

## Supporting Information

for

### **Flexible freestanding MoS<sub>2</sub>-based composite paper for energy conversion and storage**

Florian Zoller, Jan Luxa, Thomas Bein, Dina Fattakhova-Rohlfing, Daniel Bouša and Zdeněk Sofer

*Beilstein J. Nanotechnol.* **2019**, *10*, 1488–1496. doi:10.3762/bjnano.10.147

## Additional experimental results

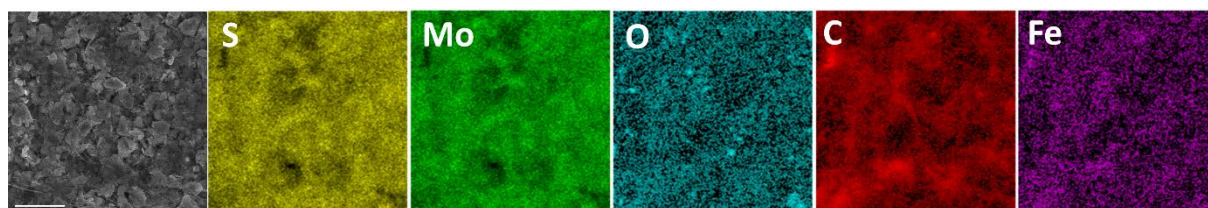

**Figure S1.** Elemental distribution maps of the MoS<sub>2</sub>/SWCNT-paper.

**Table S1.** Elemental composition obtained from SEM-EDS.

| Sample                                 | S wt % | Mo wt % | O wt % | C wt % | Fe wt % |
|----------------------------------------|--------|---------|--------|--------|---------|
| MoS <sub>2</sub> based composite paper | 29.7   | 40.9    | 2.1    | 25.1   | 2.1     |

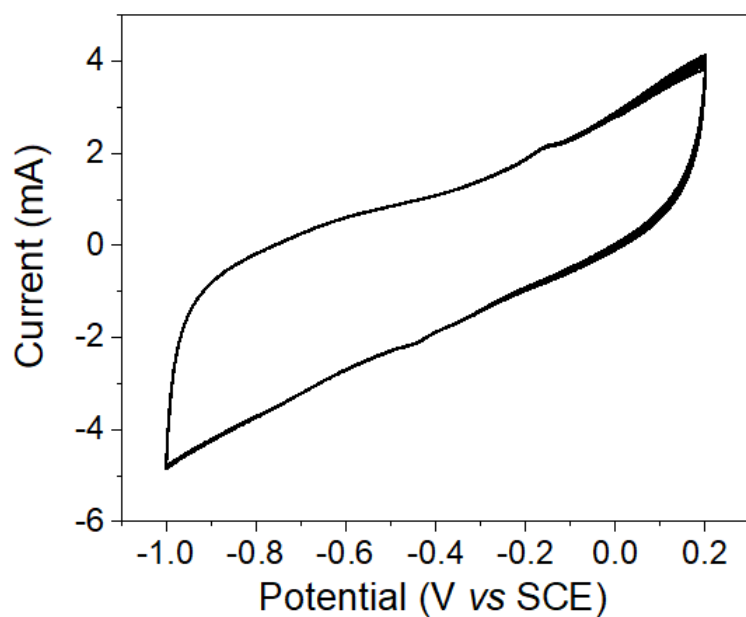

**Figure S2.** Cyclic voltammograms of MoS<sub>2</sub> based composite paper in 1 M KCl. Scan rate 100 mV s<sup>-1</sup>.

## Kinetics analysis

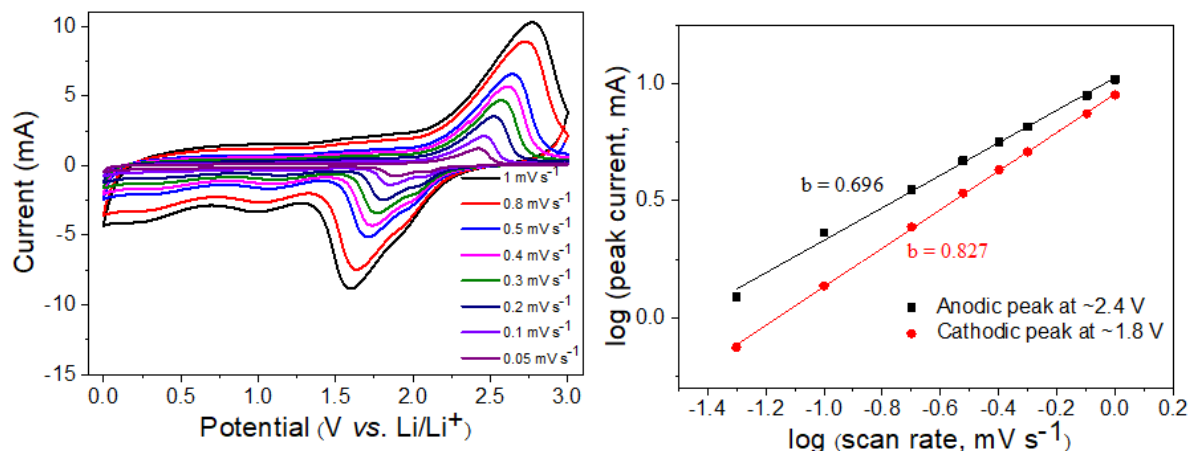

**Figure S3.** Kinetic analysis of the freestanding MoS<sub>2</sub> based composite paper. (a) CV curves at different scan rates, (b) relationship between logarithmic peak current (cathodic peak at ~1.8 V and anodic peak at ~2.4 V) and logarithmic scan rates.

CV measurements were conducted at different scan rates ranging from 1 to 0.05 mV s<sup>-1</sup> to gain insights into the reaction kinetics (Figure S2). The degree of capacitive effect can be qualitatively analyzed according to the power law:

$$i = av^b \quad (\text{S1})$$

which relates the measured peak current ( $i$ ) to the scan rate ( $v$ ),  $a$  and  $b$  are adjustable parameters [1]. The  $b$  value can be determined by fitting  $\log(i)$  versus  $\log(v)$  (Figure S2) [2]. In general,  $b = 1$  entails a capacitive surface-limited process, while  $b = 0.5$  implies a semi-infinite linear diffusion-controlled mechanism [S1-S3]. For the cathodic peak at ~1.8 V and the anodic peak ~2.4 V  $b$  values of 0.827 and 0.696 were calculated, respectively. Those values indicate a higher capacitive contribution in the case of the reduction process compared to the oxidation analogue.

## References

- S1. Xia, S.; Wang, Y.; Liu, Y.; Wu, C.; Wu, M.; Zhang, H. *Chem. Eng. J.* **2018**, *332*, 431-439.
- S2. Wu, J.; Lu, Z.; Li, K.; Cui, J.; Yao, S.; Ihsan-ul Haq, M.; Li, B.; Yang, Q.-H.; Kang, F.; Ciucci, F.; Kim, J.-K. *J. Mater. Chem. A* **2018**, *6*, 5668-5677, 10.1039/C7TA11119C.
- S3. Wang, G.; Zhang, J.; Yang, S.; Wang, F.; Zhuang, X.; Müllen, K.; Feng, X. *Adv. Energy Mater.* **2017**, *8*, 1702254.
